# Supplementary material
Source: PubMed Central journal article supplement (PMC1502487)
Supplement: pnas_0604088103_1.pdf [file pnas_0604088103_1.pdf]

1 \*Os8N3 QMGLYF-WYRKPRNTAVLPTTSDSMSPI SAAAAATQRVIELPAGTHAFTILSVSPIPI LGVHKVEVVAEQAADGVAAAA

2 \*Os11g31190 QMGLYA-MYRNSTPKAVLTKEVEAATATGDDDHSAAGVKEHVVNI AKLSAAVDVVKTRE--VHPVDVESPPAEAPPEEDDKAAAATAAAVA

3 \*Os12g29220 QMGLYV-FYMNATPVAGEGKEGKGKLA AAEELP-----VNVVVGKLA AATPDRSTGAVHVHPVPRSCAAEAAA EPEVLVDIPPPPP

4 \*Os03g22590 QMVLYV-VYKNPKKNSAVSEAAAAQQVEVKDQQQLQMQLQASPAVAPLDVDADADADLEAAAPATPQRPADDDAIDHRSVVVDIPPPQP

5 \*Os02g30910 QMALYM-AYRSKKPLVASSSSAVVAAGLEIKLPEHVKEVQAVAKGAVAA APEGRI SCGAE-VHPIDDVMPSEVVEVKVDDEETNRTDEMA

6 Os03g22200 QLALYM-AYRRTKKPAGKGGDDDEDDEEAQGVARLMGHQVEMAQQRDQQLRKGLSLSLPKPAAPLHGGLDRIIKSFSTTPIELHSILHQH

7 Os01g65880 QLILYA-IYRNHKGATPAAAAGKGDAADEVEDAKKAAA AVEMADAKTNKV VADDADADADGKSADDKVASQV

8 Os05g35140 QLVLYA-IYRNNKGA-GGGSGKQAGDD-----VEMAEGRNNKV-ADGGAADDDSTAGGKAGTEV

9 Os01g50460 QLALYA-YYSRKW RGQDSSAPLLLA

10 Os12g07860 QLILYAIYYRTTPKKQDNLELPTVAPIAKDTSIVAPVSNDDDVNGSTASHATINITIEP

11 Os09g08030 QLILYVIYYRTTPKKQNKLELPTVTPVAKDTS-VGPI SKDNDLNGSTASHVTIDITIQP

12 Os01g42110 QLILYACYYRTTPKKTKAAKDVEMPSVVVSGTGAAAAGGGNTGGGSVSVTVER

13 Os01g42090 QLILYACYYRTTPKKTKAAKDVEMPSVI-SGPGAAATA----SGGSVSVTVER

14 Os05g51090 QLILYFCYYDGSTAKNKGAL ELPKGDSSAV

15 Os02g19820 QLILYAIYYKSTQQIIEARKRKEADHVAMTDVVVDSAKNNPSSGAAAAAANGRY

16 Os01g12130 QLVLYCIYRKSHKEAEK-LHDIDQENGLKVVTTHEKITGREPEAQRD

17 Os05g12320 QLVVYCIYSKC-KEAPKVLHDIEQANVVKIPTSHVDTKGHNP
