# Supplementary material
Source: PubMed Central journal article supplement (PMC1502487)
Supplement: pnas_0604088103_2.pdf [file pnas_0604088103_2.pdf]

Os11g31190 CCGTGTCTGACCAAGGAGGTCTGAGGCGGCACGGCCACCCGGCGACGACGACC--ACTCCGC  
Os12g29220 CCGGCGAGGGGAAAGAAAGGAAGGGAAAGCTGGCGGCGGCGGAGGAGCTCC--CCGTCTGT  
**Os8N3** CCGTGTCTGCCGACGACGTCCGACTCCATGTCCCGGATCTCCGCCGCCGCCG--**CCGCCAC**  
Os03g22590 CCGCCGTGTCTGAGGCGGCCCGCCGCCAGCAGGTTGAGGTCAAGGACCAGCAGCAGCTGC  
Os02g30910 TGTGTGGCTCTGTCCTCCTCCCGTGGTGGCGGCCGGGCTGGAGATCAAGCTGCCGGAGC

Os11g31190 CGCCGGCG-TCAAGGAGCACGTCTGCA----ACAT---CGCCAAGCTCTCTGCCGCCGTCT  
Os12g29220 CGTCAACG-TCGGCAAGCTCTGCCGCCG----CCACGCCCGACAGGAGCACCGGCCCGGTG  
**Os8N3** GCAGAGGG-TGATCGAGCTCCCGCCG----GCACGCACGCCTTACCATCTGTCCGTG  
Os03g22590 AGATGCAGCTCCAGGCG-TGCGCGGCGGTGGCGCCGCTCGACGTCGACGCCGACGCCGAC  
Os02g30910 ATGTCAAG---GAGGTGCAGGCCGTCTG----CCAAGGGCGCCGTC-GCGGCAGCGCCGGA

Os11g31190 GACGT-CGTCAAGAC--CCGCG-AGGTGCACCCCG--TCGACGTCGAGTCCCGGCCGGC-  
Os12g29220 CACGTGCACCCAGTC--CCG---AGGAGCTGCGCG--GCG-----GAGGCGGCGGGCG-  
**Os8N3** AGCCC-CATCCCAGAT--CCTCG-GCGTGCACAAGG--TCG-----AGGTGGTGGCCG-  
Os03g22590 GCCGA-CTTGAGGCGGCGGCG-CCGGCCACCCCGCAGCGGCCAGCTGACGATGACGCCA  
Os02g30910 GGGCAGGATCAGCTGCGGCGCGGAGGTGCACCCCA--TCGAC---GACGTGATGCCCTC-

Os11g31190 -AGAGGCGCCGCCT-GAGGAGGACGACAAGGCCCGCCGCCACCGCCGC-CGCCGTGCG  
Os12g29220 -CGA---GCCGGAG-GTGCTCTGTCGACATT-CCGCCGCCGCCGCCGCCGCCGCCGCTCGA  
**Os8N3** -CGA-----GCAG-GCGGCCGACG-----GCGTCGCCGCCGCCGCCGC-CGCCGACAA  
Os03g22590 TCGAC-CACAGGAGCGTCTGCTGTCGACATC-CCGCCGCCGCCGACCCGC-CGCCGGCGC  
Os02g30910 -----GGAG-GTGGTGGAGGTGAAG--GTGGATGACGAGGAGACGAACCGTA--

Os11g31190 CGGCGCCGGCGAGAAGAA-----GGTAGCTGCATGAGTGCGT-GC-----ATGCG----  
Os12g29220 GGTGGCCGCCGTGTAGGGTCCCCGCCGGTCAACGCGTGCTT-GC-----ATGGCCA-  
**Os8N3** GGA-GCTGC--TGAGAACAAGCCGGAGGTGATCGAGATCACCBC-----CGCCGTGT-  
Os03g22590 TGC--CGCCGTGGAGGTGGCCCTGATCGATCAGTGAGAGGGTGACGTATTGAGCTGCTTG  
Os02g30910 ----CGGAC---GAGAT-----GCCGGTGACGGCGATCAC-GCT-----ATG-GTCAG

Os11g31190 TAC---ATGGGTC-GCCGTAAGAAG---AAGAAGGCGTGACG--TG-----TCCA  
Os12g29220 TGC---ACGTGT--GCAGTACCACGTGCCACGTACACTTTAATA-TGAA-----CTCCA  
**Os8N3** GACG--ACGACTGATCTCGACGACGA--CAGATTCTCGCTACTGATGAA-----GAAGA  
Os03g22590 TACTGCACGCGTGATGACCACGACTGACCAGAGTGACCTAATTACTGTGTGTTAGCTGCA  
Os02g30910 AACGG-AGCAGA--TCATCAAGCCTG---ACATGGCCATTGTTG-TGGAA-----GTGTA

Os11g31190 GCCCGTACGCG----GCCACGTGGCCA-----AGCTAGCT--TCAGAGCTAGTGA--A  
Os12g29220 GGGCAAACCTTGAGGAGACAAAGCTACCACCAATTAATAACT--TAATTATTACTCA  
**Os8N3** CGACGACGATGGC--CGGATCGATGACGGACAGAATTTAGCAG-TGTGGATTACTACCGA  
Os03g22590 GCTCATTCTAGCT---GAATCGCATGCA-----TCTTAGCT--AATTAATTATTAT--A  
Os02g30910 GTCTGATTAAGCT-----TAGAGAACTAGTAGTAATTCTCTCATGTGAGGTATAGC-CA

Os11g31190 GCTGC---AGACATGCTAGCTGGC-TAGC---TAGCAGTGAG-----AGAGTGCGACG  
Os12g29220 TCTTTCCCAAATATAATTACTTT--TAGCCTCTAAAATTTATCTCAAATATAGCAACT  
**Os8N3** ACTTTA--ATTAGTTGGTTAATTAT-TGGA---TTACAATGTGGT---AAGAGTGTGTCA  
Os03g22590 TATATCTGCATGCTTAATTAATTAAGTCGCGA-TATATATGTG---ACTGTATGTATCT  
Os02g30910 GCTAGCTGGTGGTACACAACATA---AACACGAACACATGTT-----CATCGGTACGT

Os11g31190 ACTAAAAAAAAGTAG-TGA--TTAATTAAGGG----CTT---GTAATTTAATCG-TTGT  
Os12g29220 TCTTCACCTATATTCTCTTA--TAAACAATCGTAACCTTCCAGTAATTAAATTTCTTAC  
**Os8N3** TTAGCAGCTAG-TTAACTTACTTAAATTAATTATCTTGTTC-AGTCAGTCAGTCAGTCAG  
Os03g22590 GTTGCCGCGTTCTTTA-TTC--TGAGTTGTAGG-ATGATT--AG-AATTTTGCTAGTGGG  
Os02g30910 ACT--AGCTAC--TAGGTGAG-ACACCTCTTGG----CGT--AGTACGTACAGTAGTACT

Os11g31190 TTTTTTTTTTCTC-TGTT-TCGTTGAGATCGATATCG-----TTGTCACC--ATGCATG  
Os12g29220 ATATATATTTCTCCTCTTATCAATCA-ATCCCAACTGCCTTTTTTTTTCATTTTATTCCTG  
**Os8N3** TCAGTCAGTCAGC---TT-TGAGTGA-----GTGAGTG-----AGTGATC---TCGACG  
Os03g22590 CTAAGTACATGTATGCACATGA-TCATCTATCAGCTG-----CTGGTCG-ATGCGTG  
Os02g30910 CCGGCCAGATCTA--GTAGGGACTGTATTGGCGCGTG-----ACTCGCCTGGTTCGTC

Os11g31190 TA--TTTCGTTTTTGTATTC-----TCAGTAAT-TAATTAGAT---GGG-----  
Os12g29220 TAACTTTCGTAATATATCCGTATATCCTATCTAAAC-TTATTATATTTTGGGATGGTGA  
**Os8N3** TAG-TTTGCTGGTTGGT-----GTAA--TAAGAAAA--GCGAT-----  
Os03g22590 TA---T-CGCCGTACGT--G-----TATGAT-TGGGGACAC---GTG-----  
Os02g30910 CAGCTTGCATGCAGAGACCG--ACCGAGCAAGCAAGCTAATTAAGC--TGGCCCGACCG  
Os11g31190 -----CTTCTT----GTAATTC AACCTGTAAGGGTTCCCTC-CATGATTA  
Os12g29220 TGGTATTATATATCTTCTTTCATGCATGCCATGCAACT-AGAGACGGGGGAAGC-TATGTGTA  
**Os8N3** -----CTACTAGTA-GTCTACTAGCT-AGT-ACGCATGCATG-TGTGTGTG  
Os03g22590 -----TACT-GCA--TCTGCATGCT-AGT-ACG-TGGCATC-TCAGTTTA  
Os02g30910 ACCGAGTGCATGCGTGTTTGTGTAACCTAGCTACTGAGGGGGGAGTGAAGGGTGTGGGTG

Os11g31190 ATTAATTAGC--G----TGTT----AATAA----TTG---TCCCACC-----  
Os12g29220 ATGTATGTGCATG----TGTT----TCTCTGGTGTGGT-TTCCGCTTCTGTTGTATTCA  
**Os8N3** CTCTACTTACC-G----TGTTGCAATCTCATCTCTTTGT-ACTTACAACCTCA-GAAATCA  
Os03g22590 TGGTACTAGCTAGACACTGTACTGCTCTCCAA--TCAAT-AAAAGCCCATGT---ATCA  
Os02g30910 TGCAATCGACCGGCC--TGTGCG-TCGATGCTCTTGCTTAGCTTCATTCGATTCATGCA
