# Supplementary material
Source: PubMed Central journal article supplement (PMC1502487)
Supplement: pnas_0604088103_3.pdf [file pnas_0604088103_3.pdf]

|        |                                                               |     |
|--------|---------------------------------------------------------------|-----|
| IR24   | GGATGAATTAACATATCATAAAGTTGAAAAATGGATTAAAAATAATATTTTTTTTAAACAA | 60  |
| IRBB13 | GGATGAATTAACATATCATAAAGTTGAAAAATGGATTAAAAATAATATTTTTTTAAAAAAA | 60  |
| IR24   | TCATATATAGAAATTTTAAATAGAAACCATACCGTTTAAAAGCTCGAGAAGTGTGCGCGT  | 120 |
| IRBB13 | TCATATATAGAAATTTTAAATAGAAACCATACCGTTTAAAAGCTCGAGAAGTGTGCGCGT  | 120 |
| IR24   | TCATCAATTCACACATTCCTCGACAAAGAACAGGGCAGAGCCTCAAACCTGGGAAGTGTTT | 180 |
| IRBB13 | TCATCAATTCACACATTCCTCGACAAAGAACAGGGCAGAGCCTCAAACCTGGGAAGTGTTT | 180 |
| IR24   | TTTCGAAGTTTGCAACCTTTAATTGTTTGCACACTGCAAATTAACCAGGGGAGTCTATGC  | 240 |
| IRBB13 | TTTCGAAGTTTGCAACCTTTAATTGTTTGCACACTGCAAATTAACCAGGGGAGTCTATGC  | 240 |
| IR24   | AAATTCACCTTTTGGTTAAGGTGCACAGTGTAACTAATCTCATTGACCAGAGTTAGTGGG  | 300 |
| IRBB13 | AAATTCACCTTTTGGTTAAGGTGCACAGTGTAACTAATCTCATTGACCAGAGTTAGTGGG  | 300 |
| IR24   | CAACTCCTCTGTGCGCTTCTCAGTTGCATTTCCAGCCACTGCTCACTGGTAACATGTAC   | 360 |
| IRBB13 | CAACTCCTCTGTGCGCTTCTCAGTTGCATTTCCAGCCACTGCTCACTGGTAACATGTAC   | 360 |
| IR24   | TGGGCAACTATCAACCACAACCTTCAGTCTACCGGTTTCATGATGTGTAGTTGCATCAGAG | 420 |
| IRBB13 | TGGGCAACTATCAACCACAACCTTCAGTCTACCGGTTTCATGATGTGTAGTTGCATCAGAG | 420 |
| IR24   | AGAGATAGTGAAGGGAGCAAATTTAACATGCTCCAACCTGAAAAACCATGTGCTATTAAT  | 480 |
| IRBB13 | AGAGATAGTGAAGGGAGCAAATTTAACATGCTCCAACCTGAAAAACCATGTGCTATTAAT  | 480 |
| IR24   | TCTACTGGTTTAGATACATTGAAGAAAAAACATCAGTCAACCATCTTTCTTTAAGCAAGA  | 540 |
| IRBB13 | TCTACTGGTTTAGATACATTGAAGAAAAAACATCAGTCAACCATCTTTCTTTAAGCAAGA  | 540 |
| IR24   | TAGCATTTAACCACCTTGAGTACAAGAAGCTGGAGAAGCACACTTACCTTTTGGTAGGGT  | 600 |
| IRBB13 | TAGCATTTAACCACCTTGAGTACAAGAAGCTGGAGAAGCACACTTACCTTTTGGTAGGGT  | 600 |
| IR24   | TTCAGAAACAAATGGAGAGCTGGAGCTGCCTAAGAGTTTGTTTTTTACAGCACATCTGCA  | 660 |
| IRBB13 | TTCAGAAACAAATGGAGAGCTGGAGCTGCCTAAGAGTTTGTTTTTTACAGCACATCTGCA  | 660 |
| IR24   | CTAGAGTCAAACCTAGAGCTGTTGTGGAGAATCTCCAGCTCAAGTTCTCCTTTTTGGAGT  | 720 |
| IRBB13 | CTAGAGTCAAACCTAGAGCTGTTGTGGAGAATCTCCAGCTCAAGTTCTCCTTTTTGGAGT  | 720 |
| IR24   | TTTAGGCATGATAAGATAACAGCTTAACATCTTTGTAGCTGTCTTATTAGCATGGAAACA  | 780 |
| IRBB13 | TTTAGGCATGATAAGATAACAGCTTAACATCTTTGTAGCTGTCTTATTAGCATGGAAACA  | 780 |

|        |                                                                |      |
|--------|----------------------------------------------------------------|------|
| IR24   | CATATATTTTATGCGCATCATCTTGCATGCCTTGTGAACAACCTGGTAGTTAATATTGGCAT | 840  |
| IRBB13 | CATATATTTTATGCGCATCATCTTGCATGCCTTGTGAACAACCTGGTAGTTAATATTGGCAT | 840  |
|        | . : . : . : . : . : . : . : . :                                |      |
| IR24   | GATAAGAACTAACTGCTCCCCATCTTGCCTAATTTTGATATGGAGCATAACAAACAGACG   | 900  |
| IRBB13 | GATAAGAACTAACTGCTCCCCATCTTGCCTAATTTTGATATGGAGCATAACAAACAGACG   | 900  |
|        | . : . : . : . : . : . : . : . :                                |      |
| IR24   | AACCATACTGATATAACAAGCAAGCAACAAATTTACAATCATTTTCTGTAACTGGGTGAC   | 960  |
| IRBB13 | AACCATACTGATATAACAAGCAAGCAACAAATTTACAATCATTTTCTGTAACTGGGTGAC   | 960  |
|        | . : . : . : . : . : . : . : . :                                |      |
| IR24   | TGAATTTTTTATTGCATAGTGGAGTTGATGGAGAATATTGAGGTGTCATTACATTTATTGA  | 1020 |
| IRBB13 | TGAATTTTTTATTGCATAGTGGAGTTGATGGAGAATATTGAGGTGTCATTACATTTATTGA  | 1020 |
|        | . : . : . : . : . : . : . : . :                                |      |
| IR24   | TAAGTGTTCATTTCATATACCAAGTTTTGGAAACAGGTGAATTGGAGGCCAGCTACATAT   | 1080 |
| IRBB13 | TAAGTGTTCATTTCATATACCAAGTTTTGGAAACAGGTGAATTGGAGGCCAGCTACATAT   | 1080 |
|        | . : . : . : . : . : . : . : . :                                |      |
| IR24   | CCACATAAACTCTTGTAAGTTATAAGCAAATCTACTCTCTTGGGCTATAGCTGGTTTTATG  | 1140 |
| IRBB13 | CCACATAAACTCTTGTAAGTTATAAGCAAATCTACTCTCTTGGGCTATAGCTGGTTTTATG  | 1140 |
|        | . : . : . : . : . : . : . : . :                                |      |
| IR24   | GAACATACATAGTAGTAGTACTAGTACTAGTACTATTGTAGTATGCATTTCTGTGGGCAT   | 1200 |
| IRBB13 | GAACATACATAGTAGTAGTACTAGTACTAGTACTATTGTAGTATGCATTTCTGTGGGCAT   | 1200 |
|        | . : . : . : . : . : . : . : . :                                |      |
| IR24   | AAACTGTCCTAGTTGAACAAGTGCAAATGTGCTAAGATTGCCATTCACTTACAATTTTAG   | 1260 |
| IRBB13 | AAACTGTCCTAGTTGAACAAGTGCAAATGTGCTAAGATTGCCATTCACTTACAATTTTAG   | 1260 |
|        | . : . : . : . : . : . : . : . :                                |      |
| IR24   | CATGCTTGTTGTGTATAAGAAAACATGTGTTAAATTCATGCACCTTGTTAGCTGTTTTTC   | 1320 |
| IRBB13 | CATGCTTGTTGTGTATAAGAAAACATGTGTTAAATTCATGCACCTTGTTAGCTGTTTTTC   | 1320 |
|        | . : . : . : . : . : . : . : . :                                |      |
| IR24   | CTTGCATTTCTTTTTGGAAAAATACATCCTGCTTATTTTCGTCTGCATCTTTTCTCTACAT  | 1380 |
| IRBB13 | CTTGCATTTCTTTTTGGAAAAATACATCCTGCTTATTTTCGTCTGCATCTTTTCTCTACAT  | 1380 |
|        | . : . : . : . : . : . : . : . :                                |      |
| IR24   | TTATATGAGTTCCATTTTGCATGACCTATATAGATATATAAGACATGAATTATGTCGATA   | 1440 |
| IRBB13 | TTATATGAGTTCCATTTTGCATGACCTATATAGATATATAAGACATGAATTATGTCGATA   | 1440 |
|        | . : . : . : . : . : . : . : . :                                |      |
| IR24   | TGCCAGAAAAGTATGAATCATCCATGCCAAGAAAAAAAAAACTAAGAAAGCATGACAATA   | 1500 |
| IRBB13 | TGCCAGAAAAGTATGAATCATCCATGCCAAGAAAAAAAAAACTAAGAAAGCATGACAATA   | 1500 |
|        | . : . : . : . : . : . : . : . :                                |      |
| IR24   | ATGTGACGCGCTTTTGCAGGTGGTATGACCTGAAATCTTGATTCTCAAGGGACCCAAAC    | 1560 |
| IRBB13 | ATGTGACGCGCTTTTGCAGGTGGTATGACCTGAAATCTTGATTCTCAAGGGACCCAAAC    | 1560 |
|        | . : . : . : . : . : . : . : . :                                |      |
| IR24   | TCTGCATTCCAAGTCCCTTGGGAAGAAAAGAGGAAGACATAATAACTTATTTTCTTGCC    | 1620 |
| IRBB13 | TCTGCATTCCAAGTCCCTTGGGAAGAAAAGAGGAAGACATAATAACTTATTTTCTTGCC    | 1620 |

|        |                                                                        |       |
|--------|------------------------------------------------------------------------|-------|
| IR24   | CCCTTTTTTCTTTTGTGAAAAGTTAGCTTGTCTCTTGGCATGAAATCTCTGCTGGGGTCA           | 1680  |
| IRBB13 | CCCTTTTTTCTTTTGTGAAAAGTTAGCTTGTCTCTTGGCATGAAATCTCTGCTGGGGTCA           | 1680  |
|        | . : . : . : . : . : . : . :                                            |       |
| IR24   | GAGACAAATGATCGATATGAAGGCTTGCAGAACAACCTCTGAATTTCTGAAAGTTTTTTTT          | 1740  |
| IRBB13 | GAGACAAATGATCGATATGAAGGCTTGCAGAACAACCTCTGAATTTCTGAAAGTTTTTTTT          | 1740  |
|        | . : . : . : . : . : . : . :                                            |       |
| IR24   | TTTCCAGGGAAAGGTATAA <b>T</b> AACCTCTGAATTTTCAAACACCTACCTCTCCAACGTCGAT  | 1800  |
| IRBB13 | TTTCCAGGGAAAGGTATAA <b>C</b> AACCTCTGAATTTTCAAACACCTACCTCTCCAACGTCGAT  | 1800  |
|        | . : . : . : . : . : . : . :                                            |       |
| IR24   | TTCCAATCAAATAGACAAGAC <b>T</b> TTTCAGGACAGACTTTTCTCTAATATCTATATAAGTAAA | 1860  |
| IRBB13 | TTCCAATCAAATAGACAAGAC <b>C</b> TTTCAGGACAGACTTTTCTCTAATATCTATATAAGTAAA | 1860  |
|        | . : . : . : . : . : . : . :                                            |       |
| IR24   | ATCCCTTTTAATTTTGGGGGAATATGCAAAAAGCAGAAGTAAAAT <b>GCCT</b> TATTAACACATA | 1920  |
| IRBB13 | ATCCCTTTTAATTTTGGGGGAATATGCAAAAAGCAGAAGTAAAAT <b>CCT</b> TATTAACACATA  | 1920  |
|        | . : . : . : . : . : . : . :                                            |       |
| IR24   | TAGTAATCACATCCAGTATCTTCTTCAAATTAAGCAGCAAATTCCTGCTAGTAAATACAC           | 1980  |
| IRBB13 | TAGTAATCACATCCAGTATCTTCTTCAAATTAAGCAGCAAATTCCTGCTAGTAAATACAC           | 1980  |
|        | . : . : . : . : . : . : . :                                            |       |
| IR24   | TGAATAATTTACAATCATTGCAGCTACATTGTTCAAACAAGAAAGTACTATATACTAACT           | 2040  |
| IRBB13 | TGAATAATTTACAATCATTGCAGCTACATTGTTCAAACAAGAAAGTACTATATACTAACT           | 2040  |
|        | . : . : . : . : . : . : . :                                            |       |
| IR24   | TTGATTACAAATTAATAATACCGCTAATTCCTAGGTAGCTAATTAATACTGCTAATTCAC           | 2100  |
| IRBB13 | TTGATTACAAATTAATAATACCGCTAATTCCTAGGTAGCTAATTAATACTGCTAATTCAC           | 2100  |
|        | . : . : . : . : . : . : . :                                            |       |
| IR24   | ACGGTTTCAACAGATAATTTGTACTTATGTACGATTCCACTATGTATATTTCTCTCCA             | 2160  |
| IRBB13 | ACGGTTTCAACAGATAATTTGTACTTATGTACGATTCCACTATGTATATTTCTCTCCA             | 2160  |
|        | . : . : . : . : . : . : . :                                            |       |
| IR24   | ATCGGAGCTCTGGTCTTAGCTCAGTGGAGGACAGAATGTGCAGTACTGTTATTGATGAAG           | 2220  |
| IRBB13 | ATCGGAGCTCTGGTCTTAGCTCAGTGGAGGACAGAATGTGCAGTACTGTTATTGATGAAG           | 2220  |
|        | . : . : . : . : . : . : . :                                            |       |
| IR24   | CACTTTTCAGTGTTCATGGAAGAAGCTGATGTATTCTGTGTTCAAGTTTACCCCACCAGT           | 2280  |
| IRBB13 | CACTTTTCAGTGTTCATGGAAGAAGCTGATGTATTCTGTGTTCAAGTTTACCCCACCAGT           | 2280  |
|        | . : . : . : . : . : . : . :                                            |       |
| IR24   | AGTCAATACATATATAAAATCTTTGCTCTTGTCTGGCTAAACTGTTTCATATACTTAGAACAC        | 23 40 |
| IRBB13 | AGTCAATACATATATAAAATCTTTGCTCTTGTCTGGCTAAACTGTTTCATATACTTAGAACAC        | 23 40 |
|        | . : . : . : . : . : . : . :                                            |       |
| IR24   | ACATATATATGGGCAACTTTTCTTACACTTTTCACTGTATCAATTTTCTCTTTGCATCAA           | 2400  |
| IRBB13 | ACATATATATGGGCAACTTTTCTTACACTTTTCACTGTATCAATTTTCTCTTTGCATCAA           | 2400  |
|        | . : . : . : . : . : . : . :                                            |       |
| IR24   | AGATCTTCTTTG <b>A</b> GAATGACATTCATCTTTTTAGGATACGAGGAATGATATTCTCAGCCC  | 2460  |
| IRBB13 | AGATCTTCTTTG <b>C</b> GAATGACATTCATCTTTTTAGGATACGAGGAATGATATTCTCAGCCC  | 2460  |

|        |                                                                |      |
|--------|----------------------------------------------------------------|------|
| IR24   | CAAACAAGGAAGCGAAATGGGATTTTGATTTTCTTTCTATAGCAATGCCACCTTCAA      | 2520 |
| IRBB13 | CAAACAAGGAGGCGAAATGGGATTTTGATTTTCTTTCTATAGCAATGCCACCTTCAA      | 2520 |
| IR24   | GATAGTGGGGTCAGTAGGGAGGGATACTGCTGAACTTTTACTGAATCTTGTGAAATTTCT   | 2580 |
| IRBB13 | GATAGTGGGGTCAGTAGGGAGGGATACTGCTGAACTTTTACTGAATCTTGTGAAATTTCT   | 2580 |
| IR24   | TTGTTACAGATATGCATGGCGTAAACGCCTTGGGAATATGAAATGATTAGTTGGAGGTGA   | 2640 |
| IRBB13 | TTGTTACAGATATGCATGGCGTAAACAC-TTGGGAATATGAAATGATTAGTTGGAGGTGA   | 2639 |
| IR24   | ATTTTTTGGCTTGTATAAACTAGTACGACGGCATTATCGATTTTTTTTTTGCATGCCCGT   | 2700 |
| IRBB13 | ATTTTTTGGCTTGTATAAACTAGTACGACGGCATTATCGATTTTTTTTTTGCATGCCCGT   | 2699 |
| IR24   | TTTCAGCAAACATTTGGATTTGTTGACAAATATTTTCATAGGGCACTTGCAAATTAGCT    | 2760 |
| IRBB13 | TTTCAGCAAACATTTGGATTTGTTGACAAATATTTTCATAGGGCACTTGCAACATTAGCT   | 2759 |
| IR24   | AACTATGTGATTCCTGCGCTTTGCTGCGGAAATTAAGTGACTATTTTTTTAATAAT       | 2820 |
| IRBB13 | AACTATGTGAT-CTCTGCGCTTTGCTGCGGAAATTAAGTGACTGTTTTTTAATAAT       | 2818 |
| IR24   | CGAGATAAAAGTAAAAATTATATTAGCTTTTAAACAACAAATAAACTGGTTTGTCAA      | 2880 |
| IRBB13 | CAAGATAAAAGTAAAAATTATATTAGCTTTTAAACAACAAATAAACTGGTTTGTCAA      | 2878 |
| IR24   | ATGTTTCAGAGAGAAATAAATTTAGTAGACTCTATATAAGATTGTAGATCAAATATGATAT  | 2940 |
| IRBB13 | ATGTTTCAGAGAGAAATAAATTTAGTAGACTCTGTATGAGATTGTAGATCAAATATGATAT  | 2938 |
| IR24   | CCCGCACTTTGATTATATGGATGAATATATAATTAATTATTATAAAAAATGATGGATATGTT | 3000 |
| IRBB13 | CCCGCACTTTGATTATATGGATGAATATATGTTAATTATTATAAAAAATGATGGATATGTT  | 2998 |
| IR24   | AAAAGTATTGTGAAAAATAATATGAAGGAAGATGATTGGATGTTGATTTGTATAATTCAA   | 3060 |
| IRBB13 | AAAAGTATTGTGAAAAATAATGTGAAGGAAGATGATTAGATGTTGATTTGTAGAATTCAA   | 3058 |
| IR24   | TGAATTACAGATGATGTTGCATGCTTACATAAGTTTGTATGTAAGTATTGCTAGTGGAT    | 3120 |
| IRBB13 | TGAATTACAGATGATGTTGCATGCTTATAAGTTTGTATGTAAGTATTGCTAGTGGAC      | 3118 |
| IR24   | GATGAAGTGGCAGGTTTGCATGTTGAGCTTTAGGATTAGCGGGTTATAATATCTTTATAG   | 3180 |
| IRBB13 | GATGAAGTGGCAGGTTTGCATGTTGAGCTTTAGCATTAGCGGGTTATAA---CTTTATAG   | 3175 |
| IR24   | ----ATAGGATATGCAATTCTCTTAAACAATGCGAATTAGATCAGAAATTTTACGATCAG   | 3236 |
| IRBB13 | TAAGATAGTATATGCAATTCTCTTAAACAATGCGAATTAGATCAGAAATTTTACGATCAGG  | 3235 |
| IR24   | TACCAAATCTTTTAGTGTAATTTTGGTACCTCCTGATATGTGAGGTAGTGAGAGTTATG    | 3296 |
| IRBB13 | TACCAAATCTTTTAGTGTAATTTTGTATACCTCCTGATATGTGAGGTAGTGAGAGTTATA   | 3295 |

|        |                                                                  |      |
|--------|------------------------------------------------------------------|------|
| IR24   | AAATTTTACACTAGAAA-----ATATATTAAC TTTTAGTACTAGCTTCTCGAGGAC        | 3347 |
| IRBB13 | AAATTTTACACTAGAAA TATATTTAAA ATATATTAAC TTTTAGTACTAGCTTCTCGAGGAC | 3355 |
|        | . : . : . : . : . : . : . : . :                                  |      |
| IR24   | TATAAAATTACTTTAGTTAGATATTTTAGTAATTTAAAAGAGAGAGAATGAAGAGGGAGA     | 3407 |
| IRBB13 | TATAAAATTACTTTAGTTAGATATTTTAGTAATTTAAAAGAGAGAGAATGAAGAGGGAGA     | 3415 |
|        | . : . : . : . : . : . : . : . :                                  |      |
| IR24   | ACAGAACTGACTTATGATGAAACATGGTTAGCTTTTTGGAATTAATTACTCGCCAAATAA     | 3467 |
| IRBB13 | A-----ACATGGTTAGCTTTTTGGAATTAATTACTCGCCAAATAA                    | 3455 |
|        | . : . : . : . : . : . : . : . :                                  |      |
| IR24   | CCTGTTGCTAACAAACTGTTTGCTAGCTTTTGGAAATTAATTCCATTGATCAGCATTCCAT    | 3527 |
| IRBB13 | CCTGTTGCTAACAAACTGTTTGCTAGCTTTTGGAAATTAATTCCATTGATCAGCATTCCAT    | 3515 |
|        | . : . : . : . : . : . : . : . :                                  |      |
| IR24   | AACTTCAGGAAAAGGTGAATGCTTCTGGTCAGTAACCTAATTAAGATCGATCTAACAAAGC    | 3587 |
| IRBB13 | AACTTCAGGAAAAGGTGAATGCTTCTGGTCAGTAACCTAATTAAGATCGATCTAACAAAGC    | 3575 |
|        | . : . : . : . : . : . : . : . :                                  |      |
| IR24   | AGAGTTAATGTTGCGGCAACAAACTGACAGATCCCTTCTTCAAGTTACCTCTCTCTAAG      | 3647 |
| IRBB13 | AGAGTTAATGTTGCGGCAACAAACTGACATATCCCTTCTTCAAGTTACCTCTCTCTAAG      | 3635 |
|        | . : . : . : . : . : . : . : . :                                  |      |
| IR24   | AA TAGGCATATTATGGTTTAATTAGCTAGACAAGAAATTAGTTAAGGTTCTTAATGAAGA    | 3707 |
| IRBB13 | AACAGGCATATTATGGTTTAATTAGCTAGACAAGAAATTAGTTAAGGTTCTTAATGAAGA     | 3695 |
|        | . : . : . : . : . : . : . : . :                                  |      |
| IR24   | TTCCGTCAC TTTTGCTAGCTTTGAAAACCTGCAGAGTGAATTGTGCAAAACATCTTGCCA    | 3767 |
| IRBB13 | TTCCGTCAC TTTTGCTAGCTTTGAAAACCTGCAGAGTGAATTGTGCAAAACATCTTGCCA    | 3755 |
|        | . : . : . : . : . : . : . : . :                                  |      |
| IR24   | TGTTGGTGTTAGTGGTACAACAGATGCTGATACAAAGAAATTAATGCTGCAATTGTTAGA     | 3827 |
| IRBB13 | TGTTGGTGTTAGTGGTACAACAGATGCTGATACAAAGAAATTAATGCTGCAATTGTTAGA     | 3815 |
|        | . : . : . : . : . : . : . : . :                                  |      |
| IR24   | AGCTCTTTTTTTTTT---TCTTTTGAACACCAAAGCACTTTTGTTTCATGGTGAAAGGGACT   | 3884 |
| IRBB13 | AGCTCTTTTTTTTTTCTCTCTTTTGAACACCAAAGCACTTT-GTTTCATGGTGAAAGGGACT   | 3874 |
|        | . : . : . : . : . : . : . : . :                                  |      |
| IR24   | ACCCTTCTCTTTCATATGTTCCCTTCTTCCTCTGTTCTTTTCATGAGATTTATTTGATGA     | 3944 |
| IRBB13 | ACCCTTCTCTTTCATATGTTCCCTTCTTCCTCTGTTCTTTTCATGAGATTTATTTGATGA     | 3934 |
|        | . : . : . : . : . : . : . : . :                                  |      |
| IR24   | CTTCCCTCTGCTCTGTTATTTTCATGTTCTTTGATAAATGTGCTGATTGTATTATCAGTG     | 4004 |
| IRBB13 | CTTCCCTCTGCTCTGTTATTTTCATGTTCTTTGATAAATGTGCTGATTGTATTATCAGTG     | 3994 |
|        | . : . : . : . : . : . : . : . :                                  |      |
| IR24   | TTATTGCACTCAATTCATTCTTGAACAGTGTGTGAATTAAC TCTTTGTTTCGATTTGAGCT   | 4064 |
| IRBB13 | TTATTGCACTCAATTCATTCTTGAACAGTGTGTGAATTAAC TCTTTGTTTCGATTTGAGCT   | 4054 |
|        | . : . : . : . : . : . : . : . :                                  |      |
| IR24   | TAGTCAC TTTGATTGCACACGAACTACTCTGCAATTCTTTTCTGACGATAGAAGTCGATTG   | 4124 |
| IRBB13 | TAGTCAC TTTGATTGCACACGAACTACTCTGCAATTATTTTCTGACGATAGAAGTCGATTG   | 4114 |

|        |                                 |                                                                             |      |
|--------|---------------------------------|-----------------------------------------------------------------------------|------|
| IR24   | . : . : . : . : . : . : . : . : | ATGGATCACCCAACATGTTACTAATTAAGTTGCATCATTGTCCATGGTTGTACATCCTTC                | 4184 |
| IRBB13 | . : . : . : . : . : . : . : . : | ATGGATCACCCAACATGTTACTAATTAAGTTGCATCATTGTCCATGGTTGTACATCCTTC                | 4174 |
| IR24   | . : . : . : . : . : . : . : . : | TACAAATAAAACTACACAAATCAAGAAAAATTTCAATAACATTTCAACTATTGTAACAAG                | 4244 |
| IRBB13 | . : . : . : . : . : . : . : . : | TACAAATAAAACTACACAAATCAAGAAAAATTTCAATAACATTTCAACTATTGTAACAAG                | 4234 |
| IR24   | . : . : . : . : . : . : . : . : | TAAAAGAAACCTATATGAGAGCTCCAGCTCTCCAAATGGCAACAGACACACTGAGTGGTC                | 4304 |
| IRBB13 | . : . : . : . : . : . : . : . : | TAAAAGAAACCTATATGAGAGCTCCAGCTCTCCAAATGGCAACAGACACACTGAGTGGTC                | 4294 |
| IR24   | . : . : . : . : . : . : . : . : | ATACGTGTCATATTGCCCTCAGTTATGCATTCATATGACCACATATTCAGAGTAGTGGA                 | 4364 |
| IRBB13 | . : . : . : . : . : . : . : . : | ATACGTGTCATATTGCCCTCAGTTATGCATTCATATGACCACATATTCAGAGTAGTGGA                 | 4354 |
| IR24   | . : . : . : . : . : . : . : . : | GAGAGGGACAGATCTAGAGGTAGAAAAAGAAAAATTCATATAAATGATATATCAGAGTGAA               | 4424 |
| IRBB13 | . : . : . : . : . : . : . : . : | GAGAGGGACAGATCTAGAGGTAGAAAAAGAAAAATTCATATAAATGATATATCAGAGTGAA               | 4414 |
| IR24   | . : . : . : . : . : . : . : . : | AAAGAAATATCAAGCACAGAAAAAAGAAAAA-GCAAAGGTTAGATATGCA-----                     | 4471 |
| IRBB13 | . : . : . : . : . : . : . : . : | AAAGAAATATCAAGCACAGAAAAAAGAAAAAAGCAAAGGTTAGATATTA <b>ACTCCAAACTCAA</b>      | 4474 |
| IR24   | . : . : . : . : . : . : . : . : | -----                                                                       | 4471 |
| IRBB13 | . : . : . : . : . : . : . : . : | <b>GTTTCGTTTATGAGAAACAAAAAGACAAATTTTCAGGTGAATAGTGTCTGTTACTATTCA</b>         | 4534 |
| IR24   | . : . : . : . : . : . : . : . : | -----                                                                       | 4471 |
| IRBB13 | . : . : . : . : . : . : . : . : | <b>CCTGAAATTTGTCTTTTTTGTACTCCTAACGAAGTTGAGTTTGAAGTTGAGATTTGGT</b>           | 4594 |
| IR24   | . : . : . : . : . : . : . : . : | -----                                                                       | 4471 |
| IRBB13 | . : . : . : . : . : . : . : . : | <b>GAGAATGTATTTTCATATCTACACCTATCTCTAGTATTTTTTTCATGAATTTATAAACTT</b>         | 4654 |
| IR24   | . : . : . : . : . : . : . : . : | -----TCTCCCCCT                                                              | 4480 |
| IRBB13 | . : . : . : . : . : . : . : . : | <b>TTAGGTATGATTTTCACGAGTTTTC AACACTTAGCTCATTTCACCGGATA</b> TGCCCC--         | 4714 |
| IR24   | . : . : . : . : . : . : . : . : | <b>ACTGTACACCACCAAAGTGGAGGGT</b> CTCCAAC <b>TATATAA</b> CACTGAGCCATGGCCAAGG | 4540 |
| IRBB13 | . : . : . : . : . : . : . : . : | -----CTCCAAC <b>TATATAA</b> CACTGAGCCATGGCCAAGG                             | 4746 |
| IR24   | . : . : . : . : . : . : . : . : | <b>CCAAACCACACATGCAGTTGTAGTAGCACTTAAGCCTTCCTCTCTAGCTAGCATCTCTTG</b>         | 4600 |
| IRBB13 | . : . : . : . : . : . : . : . : | <b>CCAAACCACACATGCAGTTGTAGTAGCACTTAAGCCTTCCTCTCTAGCTAGCATCTCTTG</b>         | 4806 |
| IR24   | . : . : . : . : . : . : . : . : | <b>TGTCAGGAAGTTGGAAGGGATTTCTGGCTAGTTTCTAGCTGGTGTCTCCTCTCCTCTTCC</b>         | 4660 |
| IRBB13 | . : . : . : . : . : . : . : . : | <b>TGTCAGGAAGTTGGAAGGGATTTCTGGCTAGTTTCTAGCTGGTGTCTCCTCTCCTCTTCC</b>         | 4866 |
| IR24   | . : . : . : . : . : . : . : . : | <b>TAACCTTCTCACTGATTAACACCTTAGAGTTAGTTAATAACCTTCATCACCAGTAGCAAT</b>         | 4720 |
| IRBB13 | . : . : . : . : . : . : . : . : | <b>TAACCTTCTCACTGATTAACACCTTAGAGTTAGTTAATAACCTTCATCACCAGTAGCAAT</b>         | 4926 |

. : . : . : . : . : . : . :  
IR24 **G**G C A G G A G G T T T C T T G T C C A T G G C T A A C C C G G C G G T C A C C C T C T C C G G T G T T G C A G G T A 4779  
IRBB13 **G**G C A G G A G G T T T C T T G T C C A T G G C T A A C C C G G C G G T C A C C C T C T C C G G T G T T G C A G G T A 4985
