# Supplementary material
Source: PubMed Central journal article supplement (PMC1502487)
Supplement: pnas_0604088103_4.pdf [file pnas_0604088103_4.pdf]

## Data Set 1. Target sequences from Affymetrix GeneChip Rice Array

(Ref. ID/Rank; Affymetrix ID; target sequence)

1. OS.10401.1.S1\_S\_AT

gtgtgacgacgactgatctcgacgacgacagattctcgctactgatgaagaagacgacgacgatggccggatcgatg  
acggacagaatntagcagtggtgattactaccgaactttaattagttgggtaattattggattacaatgtggtaaga  
gtgtgtcattagcagctagttaacttacttaaattaattatcttggttcagtcagtcagtcagtcagtcagtcagtc  
gctttgagtgagtgagtgagtgatctcgacgtagtttgctgggtgggtgtaataagaaaaaggcgatctactagtagt  
ctactagctagtagcgcagtcagtggtgtgtgctctacttaccggtgttgcaatctcatctctttgtacttaca

2. OS.12633.1.S1\_AT

gcgttctccagtagcggaccggtgtctgctgctgtt

3. OS.12633.1.S1\_S\_AT

cagggccacggcaccgggatgaccaccggcaccaccggcgcacacggcaccaccaccaccggcaccggcgagaagaa  
gggcatcatggacaagatcaaggagaagctgccggccagcactgagctcgacacaccaccaccaccatgtgtctgcg  
ccgcccggcagcggccgcccacgtcaccttccctgaataataagatgagctagccgagcgaataaaaaggaaaaaaaan  
tgttactgtcgtgtgatgagtgatgaaatgtgtgatggcgcttctccagtagcggaccggtgtctgctgctgttgg  
tgaaagtacgctgtgtatgtacgctgtagtgtaacaattccgcttggtaataacgtataa

4. OS.11491.1.S1\_AT

gggagtcttacttcatggccatggaaggggaggggtggggggcagggagccnnnnncgactccaccggcgccaggaan  
cgatcgttcccggatctcaacggagggaacagcagcaagtcagctgaggctatggtgaaaagcgtgagcaaagagtc  
tctccagtgggggctcgcgggccgggttgcaactcggggctgacctacggcctgacggaggcgcgcggggacgcacgact  
ggaagaacagcgtgggtggcgggcgccctcaccggcgcgggccgctcgcgctcacctcggaccgcgcgctcgacagcgg  
gtgggtgagtgcgccatcgccggcgccgctgtccacggcgcccaacgtgctctccggcatattgtgagccgctca  
gccggcaaattagctgtccggagttttaactacctgcatcttaacttctcaagctctgccattgttatgctagctgtt  
ggagcttggaaagtcttcagtgtagcactcgttgttaattggcatcttgtatgcttggatttctctgtgctatcacg

5. OS.519.1.S1\_AT

ggtggacatgcctgggctcaagtcctccgacatcaaggtgcaggtggaggaggagaggctnctgggtgatcagcgggg  
agcggcgggcgcgggcgggggaggaggagaaggaggagtcggtgcaagtaacctgaggatggagcggcggatgggcaag  
ttcatgcgcaagttcgtgctccccgacaacgcccagctcgacaagatctccgcccgtgtgcccaggacggcgctcac  
cgtcacctcgagaagctcccgcggcgggcccaagaagcccaagaccatcgaggtcaaggtcgcgctgatgagatt  
ccgcatctctcgcagatcgctcgctgctgctggatcaagaatcgaagcttgagttgagtgagttgtgactagtagta  
tgagtagagtgttcatctttatcgtttgctacgtgagaatgtgaggacatgggtggctgtatgccgtatgcgatgtg  
atgatgatggatgggtttgatgtttggtaatggaaatggggatgttctgctgcttatctgaataaataactctgcat  
cttttg

6. OS.12551.1.S1\_S\_AT

agtacaccaaggactctgccatcgccggcaaggacaagaccggcagcgtcctccaacaggcgagtgagcaggtgaag  
agcagcgggtggtcgccgccaaggacgcgggtgatgagcagcgtggggatgaccgaagacgangggccggcaccgacgacg  
gcccacaaggacacnctctgnccaccngncngcccaccggagacgacggcgagggatcactagacgcctgtg  
aatgatttcccttgggtctatttatgtatgttttcaacttcaaattcgggtgcaagtttgaatttgttttgtgtcgt  
tttgagctctgtatcgatgctgtatgaagtgggtgctcgccaggggaggatcttctgacgggtgtgggtgatgtgtac  
tgatgatgttcagttgttttcgtcagagtttctcgtctgtgttctgtttattatggcgtaacaataaaaagtttg  
ggcctaaagcccgcatttg

7. OS.54869.1.S1\_AT

gcaagcgtcatccgagcgtcgactacgacgccacgggctgcctgcgcgagctcaaccgcttcgcccgaagcac  
aacgcgaggttccggcgccatcgccgacgagctccggccgctgacccggccgcccggcgtcgccacgcccacta  
cttcaactccttctcgccctcctcgacgcggcgagctcggttcgacgcgggcagcgcgcgagggcgtgct  
gcccgcggcgggcgagtaactacgacccgaggaggatgtgcccgcggagggggcgggcggtgcccggag  
ccggagaagtagctgagctgggacgggtacacatgacgcaggcggcgtacagggcgatgtcgaggctcgtctacca

tgggatgtacctggagccgcagatactgagttctcgccgatgcgccatagatctcctgaggctggagagtgtgtcgtc  
atgcagaagctgagacgaagatgatggagctaattttgaggcttcttctctctgagttcatctgctcagagaat  
a

8. OS.39552.1.A1\_S\_AT

agaccgacgaatgatcaagcctcctaacaaatcaatcatagctttttccatacaccctgttttcattgcttttgc  
aagtttttttgaccttatggttgttttgtgccaaacaaatgatgcattttgtcataagtgtcattttgtggatgctgct  
gtagctgaacattgtaacttgtcgggggatgtgtttttgccatttctctcgttgccttgggttgcctgattttgtt  
tgagggcaacttgcgatcgcaggttaagtgttggctcctcaatcatatgatgtagctt

9. OS.27695.1.S1\_AT

tccgggcccattgtagacgaagaacaaggaaggtgttcgtcgccaacgccctcaagctgcgagaggtggtcgc  
gacgaggagctccatgcgaggtacatcgacgagttcatacaccagcttaggttaagctctcctacgtacctcgccag  
ctcatgaatgaaccccgctcttgggcccattggattgtaatccctacaaataataatgtccttccctcgtttcagaata  
taagtcattttagtattttccacatatattgatgttaataaatctagatagatatatatatgtctagattcatta  
acatcaatataaatatgagaaatattaaatgacttacattgtgaaacagagggagtacgtacgtacgtgtgtatgt  
gtgtctgtctgtcattttggatcatgccattgcaattttattgtattaaaaaaatacatgcatgtacgtacgtacgt  
gtgtctgtcggctcatttt

10. OS.55380.1.S1\_AT

agcttggcgccgtctccggtagctacgncgccgagcccacgcgcgtcggtttcacctatggcgccggcgccctgctcc  
gacgacgtcaacaccgagctcgccaccggcgccagcggccatggcaccgtcgccgtcaactaccctggaggcgtgg  
cccagccgcccgcgcccggggaccgatggggcgaacgcgacgacgcggcgccgcagccaacgaccggagt  
ggcgccgcccgcgctgctccggtggtggcggcgctcgtcgtcacgtcgtgggagcatacatcggtacgccatgct  
agctatctgaagcttctgcttctgacgtgacgtgttctttttattttgtgacgtgtaaagttaaatgaaatcgagtgg  
tatattgttacagataccgtagagactagagaggattatctctggattttgtttttgcatgggt

11. OS.18064.1.S1\_AT

agttggagaaaacttgcctcggatattggtttcttgggtgatgcnatgtgttaggtgagntttgatgcctcgggagagcg  
ttgccnggtgatgatcgggagtc aaattgggagaaaatgatgtccgtatgatcaagatatcatgcgggatacttaga  
ctaaagatcaatgcacgtggttagtgaagattccatatagcatacgaattgngatattgtgtgcatatggaatgcaga  
gtctgttgatgatattccctagaggcaatca

12. OS.8741.1.S1\_AT

tgttccctatgcttctgcaggagatccagcgggttcggtccatccccgaagctgcagactttgcagaggacgtacaac  
tgcttcaagagaggacagatgaagaaggaccagttcatccgggttcttgcgctcccacatcggcgacaatgtgttgac  
caccgtggccaagaaactccgagggtagtgcaggtgcaaatttgtctccactccgtggctgaattcgactaac  
tccgtagaatcgaacagtgctgctcgtgtaccaatcctgacaggggttattctctctctgatgctgcttttagt  
cgggtgctcaaatgtttattgtcatgaacatagagggggttactgtgatcttccaattaa

13. OS.10546.1.S1\_S\_AT

aacgccaggtacatcgaggacgtgtggcgctcggcgtgcccgttcgcccggcgggcgggcgacggcgggcggggt  
ggtgaggagggaggaggtggagaggaaggtgagggaggtgatggagggggagaggagcaaggagtcatgaggaacg  
cggcgagctggagctccaaggcgaggagcgcctatgggcgaaggtggcagctcggacaggaacatcgccgagttcctg  
tccaagtatcgggttgcgcgcgatgggaccaaattgatttttcggcgcatatgttatgcttttgccttctcattgtcgt  
ttgtggtcaattaattaattgatggatcgccctcgccatgaatttggaaacannnnnanannnnannnngctatggt  
tgttgagttggatgatgt

14. OS.47946.1.S1\_S\_AT

gtgtgttctaccacttgtacaaccaagtgtcctacatgtcattggacgagatctcaccactgacattcagcatcggc  
aacaccatgaagcggatctccgtcattgtcgcctccatcatcatcttccacacgcgggtccagcccacacgcct  
cggagccgcccattgcatctcggaaactttcatctactctcaggcgaagcagtaatggcataagcatggaaatggca  
cccgttttcgccacaagtgcgcgactcgggtgctcgggatgtaacaatgctatgagcatatatccaaggatcccttcta  
atatattagatcttcttttcttttcttttcttctctaggtgtagctgccaatgtttcttctgaattcgtcaggt  
tcttgtactatgactat

15. OS.55776.1.S1\_AT

attggcagtcctgggttcgaatcattgtgcccacatagaacgatggaatcgcaaaaaacgatgattggttagtatacacta  
tatgtatgggtgtttatccacctacggacatgatatatgtgtatgtgtgtactcgttaattagtgagaatttaaatcca  
ttttctgttgat

16. OS.49648.1.S1\_S\_AT

cggcgagtacgcgttcgtgctcgacgtccctggnetctccaagtcggacatccaggtgacgctggaggaggacaggg  
tgctgggtgatgaagagcagcaatggcgccgggaacgggaagcggaagngngaggaggagggaaggggagtncaagtac  
atccgcctcgagcgcgcgctcgccgagggcggttcgcgcgcaagttccgcctcccggaggacgcggacaccggcgg  
catctcggcgcgatgcgagaacgggggtgctcacggtcaccgtcaagaagcggcgcgcgggagagaagaagaccaagt  
ccgtccaggtcaccatcgccctgaatcatagcgtagtgtcgggtaatggcagcgtggcggtagtagaagctggaaat  
ggttgcccagagaatgggtggagcagtagaatgtgtttgtgctctgttcggtggttcggtagtacaagttgtcgctgatc  
tgctatgtataaacgctgggtgtgaccgtgaagatgaagactacggaagtagctgttcttttgtgtaggatcaagcaa  
attatgtcaaactctcgttcgtgaacg

17. OS.6043.1.S1\_AT

cttcgctcgaggtagatcacatggatagtgctcnaatgaagcagatgggtggaggctgctctctcccagcttgtggcga  
ccggcagtcgggttagctccatgagctattagttatgagctggatagatataggagtcatgcgtttttggccacct  
actttacctagtctcattcgcaataaagcgcattttttatgtatgcttgggtgatgttgttgttgcattttttgcgaca  
ccccnctacgtgatggaggtgggtgttttcttgcgagggcaacgatttagtggtggtgatgatagatttaagtattttg  
gaaatcttgagtagcgtgacttgtttatgtagcta

18. OsAffx.30138.1.S1\_at

aaaagccaaccaagaaagagttcgacgagggaaatcgaagctcgaagccatgggtgggtgcaatccggcgaggggaagcgt  
ccatgtcgtcctcgtgccatacccgtcccagggccacatcaaccgggtgctccagttcggcaagcgcctcgccggcc  
atgacggcgtccgggtgacccgtcgccgtgacgcgggttcgctcgtcggctcgaccaccaagccctgcagcctcggctcg  
tcgcccgggtgcgcgctcggcgtgttctccgacggctgacgagggcgccggccggcgagctcggcgggccaccggcggccc  
gtacttccagcggctggaggaggccgggtcgggtgctccctggacgagctgctccgcccgggagggcgagcgggggacgc  
cggcgaggtgggtggtgtagcagacagttcatgcccgtgggtgccccggctggcgcgccaccggcgcgctgcgcg  
gcttccctgacgcagcagctgcgccgtggagctggtgtacacgacgcgcgctccggggcctcccgggtgcccgtggg  
ggaggcggagcggcgcctccggctgcccgggtgcccgggtggagctcgacgcggcgacgtgcccagcttccctggccg  
cccacgacacgcaccaccctccatgcgcgctgctgatgaaccagttcgtcggcctcgacaacgtcgaccacgtg  
ttcgtcaactcgttctacgagctcgagcctcaggaagcggagtagatggcgggcgacatggggcgagggacgatcgg  
gcccagcgtgccatcggcgtacctcgacaaccgcctcccggacgacgcgctcgtacggcttccacctccacacgcgga  
tggcgggcggtgcccgggagtggtggacgcgcggccggcgggctccgtgggtgtagcctcgttcgggagcatcgcg  
gcgcccggggccgggagacgatggccgaggtcgccgagggcctctacagcagcggcagcccattcctctgggtgggtccg  
cgccacgggagaccggtaagctccccgcggcttcgcccggcaggggcgaagaacaccggcctcatcgtgccatgggtgcc  
cgcagctggaggtgctcgcgcacgcgcgctgggtgcttctgtgacgcactgcccgtggaactccaccgtcgaggcg  
ctcagcgcggcgctgcccgatgggtggcggtgcccagtggtcggaccagacgacgaacgccaggtacatcgaggacgt  
gtggcgctcggcgtgcccgttccggcgggcgggcgggcgacggcgggcggtggtagggaggaggagggtggaga  
ggaaggtgaggagggtgatggagggggagaggagcaaggagttcatgaggaacgcggcgagctggagctccaaggcg  
aggagcgcctggcggaaggtggcagctcggacaggaacatcgccgagttcctgtccaagtatcggttgcccgcgca  
tgggaccaaatagatttttcggcgcatatgttatgcttttctcattgtcgtttgtggtcaattaattaattgat  
ggatcgccctcgccatgaatttggaaacagtttcatagtttatgcatcgctatgggtgttggagttggatgatggtgatt  
tagggattgtctaaatttcaggtgactgaagtttttagttctc

19. OS.2694.1.S1\_AT

aagcacggcagcagtagctcgacgtacgacaacgaggggaaggtttatgccggtcaatttcgagagcatcttcagcaa  
gaacgcccgcagcgcgggacaagctcacgttcggcgatatctggcggtgaccgaaggccaaaggggtggcgctcg  
acttgcttgggaggatcgcgagtaagggggagtggtatattgctctacgtgcttgcgaaagatgaggaaggattcctc  
aggaaggaggtgttcgcgctgcttcgatgggagcctattcgagtcgattgccagcagagaagggaggcacatga  
gaagcagaagtagcctcctaatttcatcgtcccgggacctgggatgtgcttgattgcttgtgtgtgttgtgtgtg  
actatagctatagccacatcatgtttgtccatctg
