# Supplementary material
Source: PubMed Central journal article supplement (PMC1502487)
Supplement: pnas_0604088103_5.pdf [file pnas_0604088103_5.pdf]

## Data Set 2. *Os8N3* probe sequences

>*Os8N3* 5' probe sequence

GACACATGCAGTTGTAGTAGCACTTAAGCCTTCCTCTCTAGCTAGCATCTCTTGTGTCAGGAAGTTGGAAGGGATTT  
CTGGCTAGTTTCTAGCTGGTGTCTCCTCTCCTCTTCCTAACCTTCTCACTGATTAACACCTTAGAGTTAGTTAATAA  
CCTTCATCACCAGTAGCAATGGCAGGAGGTTTCTTGTCCATGGCTAACCCGGCGGTACCCTCTCCGGTGTTCAGG  
AAACATCATCTCCTTCCTGGTGTTCCTTGCACCAGTGGCGACGTTCTTGCAGGTGTACAAGA

>*Os8N3* 3' probe sequence

GACTCCATGTCCCCGATCTCCGCCGCCGCCGCCACGCAGAGGGTGATCGAGCTCCCCGCCGGCACGCACGCCTT  
CACCATCCTGTCCGTGAGCCCCATCCCGATCCTCGGCCTGCACAAGGTCGAGGTGGTGGCCGCCGAGCAGGCGGCCG  
ACGGCGTCGCCGCCGCCGCCGCCGACAAGGAGCTGCTGCAGAACAAGCCGGAGGTGATCGAGATCACCGCCGCC  
GTGTGACGACGACTGATCTCGACGACGACAGATTCTCGCTACTGATGAAGAAGACGACGACGATGGCCGGATCGATG  
ACGGACAGAATTTAGCAGTGTGGATTACTACCGAACTTTAATTAGTTGGTTAATTATTGGATTACAATGTGGTAAGA  
GTGTGTCATTAGCAGCTAGTTAACTTACTTAAATTAATTATCTTGTTTCAGTCAGTCAGTCAGTCAGTCAGTCAGTCA  
GCTTTGAGTGAGTGAGTGAGTGATCTCGACGTAGTTTGCTGGTTGGTGTAATAAGAAAAAGGCGATCTACTAGTAGT  
CTACTAGCTAGTACGCATGCATGTGTGTGTGCTCTACTTACCCTGTTGCAATCTCATCT
