# Supplementary material
Source: PubMed Central journal article supplement (PMC1502487)
Supplement: pnas_0604088103_6.pdf [file pnas_0604088103_6.pdf]

**Table 1. Microarray hybridization values for three replicates of treatment of rice leaves with PXO99<sup>A</sup> or ME2**

| <b>REF. ID<br/>RANK*</b> | <b>ME2<br/>a</b> | <b>ME2<br/>b</b> | <b>ME2<br/>c</b> | <b>PXO99<sup>A</sup><br/>a</b> | <b>PXO99<sup>A</sup><br/>b</b> | <b>PXO99<sup>A</sup><br/>c</b> |
|--------------------------|------------------|------------------|------------------|--------------------------------|--------------------------------|--------------------------------|
| 1                        | 729              | 100              | 100              | 30059                          | 36659                          | 28917                          |
| 2                        | 784              | 731              | 187              | 3721                           | 25040                          | 5543                           |
| 3                        | 415              | 703              | 206              | 2199                           | 14253                          | 3127                           |
| 4                        | 489              | 656              | 223              | 999                            | 8616                           | 2323                           |
| 5                        | 514              | 366              | 350              | 739                            | 8137                           | 708                            |
| 6                        | 1286             | 4482             | 1921             | 8344                           | 19133                          | 9277                           |
| 7                        | 654              | 1357             | 1300             | 1612                           | 6248                           | 7854                           |
| 8                        | 619              | 469              | 282              | 902                            | 3778                           | 1647                           |
| 9                        | 255              | 193              | 241              | 678                            | 1345                           | 896                            |
| 10                       | 1128             | 884              | 626              | 1847                           | 5593                           | 3017                           |
| 11                       | 205              | 343              | 171              | 981                            | 769                            | 1017                           |
| 12                       | 262              | 780              | 548              | 793                            | 2864                           | 2294                           |
| 13                       | 318              | 2164             | 2805             | 2618                           | 8876                           | 8249                           |
| 14                       | 568              | 2166             | 1836             | 1307                           | 11397                          | 4167                           |
| 15                       | 568              | 784              | 3684             | 713                            | 7757                           | 9873                           |
| 16                       | 673              | 964              | 832              | 1174                           | 6168                           | 1615                           |
| 17                       | 168              | 485              | 3587             | 774                            | 5738                           | 8820                           |
| 18                       | 175              | 1843             | 1664             | 1720                           | 5946                           | 5534                           |
| 19                       | 312              | 1461             | 1269             | 844                            | 5614                           | 4176                           |
| <b>Os8N3 related+</b>    |                  |                  |                  |                                |                                |                                |
| Os11g31190               | 254              | 193              | 305              | 215                            | 100                            | 115.8                          |
| Os12g29220               | 212              | 1057             | 1806             | 293                            | 1098                           | 1036                           |
| Os03g22590               | 100              | 100              | 100              | 100                            | 100                            | 100                            |
| Os02g30910               | 125              | 100              | 100              | 251                            | 5167                           | 370                            |

\* Reference ID was assigned on basis of rank in fold increase of average value of the three replicates with PXO99<sup>A</sup> compared with the average value of the three replicates with ME2. Affymetrix target sequence ID and fold change are provided in Table 2.

+ Values for four of the closest related other members of MtN3 family in rice.
