# Supplementary material
Source: PubMed Central journal article supplement (PMC1502487)
Supplement: pnas_0604088103_7.pdf [file pnas_0604088103_7.pdf]

**Table 2. Fold increase and database matches for top target sequences**

| REF ID/<br>RANK | PXO99 <sup>A</sup><br>average * | ME2<br>average† | <u>PXO99<sup>A</sup></u><br>ME2 | cDNA<br>match‡   | Similarity‡                                        |
|-----------------|---------------------------------|-----------------|---------------------------------|------------------|----------------------------------------------------|
| 1               | 31878                           | 310             | 103                             | AK070510         | MtN3                                               |
| 2               | 11435                           | 567             | 20                              | U60097           | dehydrin                                           |
| 3               | 6526                            | 441             | 15                              | U60097           | dehydrin                                           |
| 4               | 3979                            | 456             | 9                               | AK063714         | HSP20                                              |
| 5               | 3195                            | 410             | 8                               | AK071240         | Mitochondrial import                               |
| 6               | 12252                           | 2563            | 5                               | U57641           | LEA-like protein mRNA, embryo-specific             |
| 7               | 5238                            | 1104            | 5                               | AK106962         | GDSL-like Lipase/Acylhydrolase                     |
| 8               | 2109                            | 457             | 5                               | CF311010         | Protein phosphatase 2C-like                        |
| 9               | 973                             | 230             | 4                               | AK121202         | UDP-glucuronosyl/UDP-glucosyl transferase          |
| 10              | 3486                            | 879             | 4                               | AK107980         | Plastocyanin-like                                  |
| 11              | 922                             | 240             | 4                               | CF337042         | Hypothetical protein                               |
| 12              | 1983                            | 530             | 4                               | AK102303         | None                                               |
| 13              | 6581                            | 1762            | 4                               | AU183565         | putative indole-3-acetate beta-glucosyltransferase |
| 14              | 5624                            | 1523            | 4                               | AK070124         | Mitochondrial import                               |
| 15              | 6114                            | 1679            | 4                               | AK108785         | None                                               |
| 16              | 2986                            | 823             | 4                               | AK119261         | HSP20                                              |
| 17              | 5111                            | 1414            | 4                               | AB040744         | RERJ1 transcription factor                         |
| 18              | 4400                            | 1227            | 4                               | tigr:9637.m02954 | glucose:salicylic acid glucosyltransferase         |
| 19              | 3545                            | 1014            | 4                               | X89891           | Ca binding EF hand protein                         |

\* Average of three values for PXO99<sup>A</sup> in Table 1.

† Average of three values for ME2 in Table 2.

‡ cDNA and similarity matches provided at Affymetrix Netaffx Analysis Center web site [www.affymetrix.com/analysis/index.affx](http://www.affymetrix.com/analysis/index.affx).
