# Supplementary material
Source: PubMed Central journal article supplement (PMC1502487)
Supplement: pnas_0604088103_8.pdf [file pnas_0604088103_8.pdf]

**Table 3. Strains and plasmids used in the study**

| Strain or plasmid                           | Relevant characteristics                                            | Reference/Source |
|---------------------------------------------|---------------------------------------------------------------------|------------------|
| Strains                                     |                                                                     |                  |
| <i>Xanthomonas oryzae</i> pv. <i>oryzae</i> |                                                                     |                  |
| PXO99 <sup>A</sup>                          | 5-Azacytidine resistant, race 6                                     | 1                |
| PXO99 <sup>A</sup> ( <i>avrXa7</i> )        | PXO99 <sup>A</sup> with <i>avrXa7</i>                               | 3                |
| PXO99 <sup>A</sup> ME7                      | <i>hrpC</i> mutant, Kn <sup>r</sup>                                 | 5                |
| PXO99 <sup>A</sup> ME2                      | <i>pthXo1</i> mutant of PXO99 <sup>A</sup>                          | 3                |
| PXO99 <sup>A</sup> ME2( <i>pthXo1</i> )     | ME2 with pZWpthXo1 in pHM1                                          | 3                |
| PXO99 <sup>A</sup> ME2( <i>avrXa7</i> )     | ME2 with pZWavrXa7 in pHM1                                          | 3                |
| PXO99 <sup>A</sup> ( <i>avrXa7-sacB50</i> ) | PXO99 <sup>A</sup> with pZWavrXa7- <i>sacB50</i> ) in pHM1          | 2                |
| PXO86                                       | Philippine race 2                                                   | 1                |
| T7174                                       | Japanese race 1                                                     | J. Leach         |
| PXO61                                       | Philippine race 1                                                   | J. Leach         |
| Plasmids                                    |                                                                     |                  |
| pBluescript II KS(+)                        | Phagemid, pUC derivative, Cb <sup>r</sup>                           | Stratagene       |
| pCR2.1-TOPO                                 | Phagemid, Cb <sup>r</sup> , Kn <sup>r</sup>                         | Invitrogen       |
| pZWpthXo1                                   | <i>pthXo1</i> fused to <i>lacZ</i> promoter of pBluescript II KS(+) | 3                |
| pZWavrXa7                                   | <i>avrXa7</i> fused to <i>lacZ</i> promoter of pBluescript II KS(+) | 4                |
| pZWavrXa7- <i>sacB50</i>                    | deletion variant of pZWavrXa7                                       | 2                |
| pHM1                                        | Broad-host range vector with pUC19 polylinker, Sp <sup>r</sup>      | 1                |

1. Hopkins, C. M., White, F. F., Choi, S., Guo, A. & Leach, J. E. (1992) *Mol Plant-Microbe Interact* **5**, 451-459.
2. Yang, B., Sugio, A. & White, F. F. (2005) *Mol Plant-Microbe Interact* **18**, 142-149.
3. Yang, B. & White, F. F. (2004) *Mol Plant-Microbe Interact* **17**, 1192-1200.
4. Yang, B., Zhu, W., Johnson, L. B., & White, F. F. (2000) *Proc. Natl. Acad. Sci. USA* **97**, 9807-9812.
5. Zhu, W., Magbanua, M. M. & White, F. F. (2000) *J. Bacteriol.* **182**, 1844-1853.
