# Supplementary material
Source: PubMed Central journal article supplement (PMC1502487)
Supplement: pnas_0604088103_9.pdf [file pnas_0604088103_9.pdf]

**Table 4. Primers used for gene probe, sequencing, and quantitative RT-PCR**

| <i>Os8N3</i> probe primers               |                                 |
|------------------------------------------|---------------------------------|
| 5'probe forward                          | 5'-GACACATGCAGTTGTAGTAGCAC-3'   |
| 5'probe reverse                          | 5'-TCTTGTACACCTGCAAGAACGTC-3'   |
| 3'probe forward                          | 5'-GACTCCATGTCCCCGATCTCC-3'     |
| 3'probe reverse                          | 5'-AGATGAGATTGCAACACGGTAAG-3'   |
| <i>Os8N3</i> promoter sequencing primers |                                 |
| F1                                       | 5'-GGATGAATTAACATCATAAAGTTG-3'  |
| R1                                       | 5'-GTAAGTGAATGGCAATCTTAGCAC-3'  |
| F2                                       | 5'-TGCATTTCTGTGGGCATAAACTGTC-3' |
| R2                                       | 5'-TGAATGTCATTCGCAAAGAAGATC-3'  |
| F3                                       | 5'-ATCTTTGCTCTTGTCGGCTAAACTG-3' |
| R3                                       | 5'-TCCTGAAGTTATGGAATGCTGATC-3'  |
| F4                                       | 5'-AATTACTCGCCAAATAACCTGTTGC-3' |
| R4                                       | 5'-TACCTGCAACACCGGAGAGGGTGAC-3' |
| <i>POX22.3</i> qRT-PCR primers           |                                 |
| RT- <i>POX22.3</i> -F                    | 5'-ACGACATAAACGGGCCACAC-3'      |
| RT- <i>POX22.3</i> -R                    | 5'-TAGGTGCTAATGCCATGGCTG-3'     |
| RT-TF2-5F                                | 5'-GGGTTTGCTGCTGGTATTTGTTAG-3'  |
| RT-TF2-5R                                | 5'-GTTGCTGCTGTGATATACTCTG-3'    |
